# Supplementary material for: Discontinuation rates in clinical trials in musculoskeletal pain: meta-analysis from etoricoxib clinical trial reports
Source: Springer Nature journal article supplement (doi:10.1186/ar2422), 2008-05-08
Supplement: Additional file 1 [file ar2422-s1.pdf]

Additional file 1: Details of trials and information extracted on discontinuations

| Trial number                | Description                                                                                                                                                                                                                               | Demographics                                                                                                                                        | Duration weeks<br>Compliance<br>Exposure                      | Treatments (N)                                                | All cause                                              | Lack of efficacy                                    | Clinical AE                                        |
|-----------------------------|-------------------------------------------------------------------------------------------------------------------------------------------------------------------------------------------------------------------------------------------|-----------------------------------------------------------------------------------------------------------------------------------------------------|---------------------------------------------------------------|---------------------------------------------------------------|--------------------------------------------------------|-----------------------------------------------------|----------------------------------------------------|
| <b>Studies of 4-6 weeks</b> |                                                                                                                                                                                                                                           |                                                                                                                                                     |                                                               |                                                               |                                                        |                                                     |                                                    |
| 805                         | OA knee or hip<br>At least 40 years<br>Radiographic diagnosis<br>At least 6/12 symptoms<br>Minimum 40/100 mm at inclusion on flare visit, plus ≥15 mm increase and worsening in investigator global assessment since baseline visit       | Female 80%<br>Caucasian 81%<br>Mean age 63 years<br>Age range 38-89 years<br>Hip 23%<br>Knee 77%<br>Median duration 5 years<br>ARA Class II/III 80% | 6<br>E60 40<br>Diclo 150 41                                   | E60 256<br>Diclo 150 260                                      | E 27<br>Diclo 15                                       | E 7<br>Diclo 1                                      | E 14<br>Diclo 9                                    |
| 806                         | Chronic low back pain<br>At least 18 years<br>Use of analgesics or NSAID regularly 30 days. Minimum 40/100 mm at inclusion washout visit, plus increase of ≥10 mm, and worsening in investigator assessment since                         | Female 72%<br>Caucasian 74%<br>Mean age 52 years<br>Age range <20-90 years                                                                          | 4<br>E 60 27<br>Diclo 150 27                                  | E 60 224<br>Diclo 150 222                                     | E 20<br>Diclo 25                                       | E 1<br>Diclo 5                                      | E 15<br>Diclo 13                                   |
| 007                         | OA knee<br>At least 40 years<br>Radiographic and clinical diagnosis<br>At least 6/12 symptoms<br>Minimum 40/100 mm at inclusion on flare visit, plus ≥15 mm increase and worsening in investigator global assessment since baseline visit | Female 72%<br>White 89%<br>Mean age 61 years<br>Age range 40-87 years<br>Median duration 6 years<br>ARA Class II/III 85%                            | 6<br>E 5 41<br>E10 39<br>E30 42<br>E60 41<br>E90 42<br>Pbo 38 | E 5 117<br>E10 114<br>E30 102<br>E60 112<br>E90 112<br>Pbo 60 | E 5 12<br>E10 17<br>E30 8<br>E60 9<br>E90 11<br>Pbo 10 | E 5 6<br>E10 11<br>E30 4<br>E60 2<br>E90 2<br>Pbo 7 | E 5 2<br>E10 2<br>E30 3<br>E60 3<br>E90 6<br>Pbo 2 |
| 32                          | At least 18 years<br>Diagnosis of AS by NY criteria<br>At least 6/12 symptoms<br>Minimum 40/100 mm at inclusion flare visit                                                                                                               | Female 22%<br>White 71%<br>Mean age 44 years<br>Age range 18-78 years                                                                               | 6<br>E90 41<br>E120 41<br>Nap 1000 39<br>Pbo 31               | E90 103<br>E120 92<br>Nap 1000 99<br>Pbo 93                   | E90 11<br>E120 9<br>Nap 1000 21<br>Pbo 45              | E90 8<br>E120 9<br>Nap 1000<br>20<br>Pbo 44         | E90 2<br>E120 0<br>Nap 1000<br>1<br>Pbo 0          |

**Studies of 8-12 weeks**

|     |                                                                                                                                                |                                                                                              |                   |             |            |         |          |
|-----|------------------------------------------------------------------------------------------------------------------------------------------------|----------------------------------------------------------------------------------------------|-------------------|-------------|------------|---------|----------|
| 010 | At least 4 of 7 ARA criteria                                                                                                                   | Female 83%                                                                                   | 8                 | E10 78      | E10 11     | E10 5   | E10 2    |
|     | At least 6/12 duration                                                                                                                         | White 62%, Hispanic 27%                                                                      | E10 52            | E60 126     | E60 9      | E60 2   | E60 6    |
|     | 18 years or older                                                                                                                              | Mean age 52 years                                                                            | E60 54            | E90 134     | E90 6      | E90 2   | E90 3    |
|     | Patient global assessment $\geq$ 40 mm, $\geq$ 9 tender and $\geq$ 6 swollen joints                                                            | Age range 16 to 82 years                                                                     | E90 55            | E120 120    | E120 10    | E120 3  | E120 5   |
|     |                                                                                                                                                | Median duration 7 years<br>ARA Class II/III 71%<br>methotrexate 31%,<br>corticosteroid 22%   | E120 53<br>Pbo 53 | Pbo 123     | Pbo 15     | Pbo 11  | Pbo 3    |
| 018 | OA knee or hip                                                                                                                                 | Female 66%                                                                                   | 12                | E60 222     | E60 37     | E60 13  | E60 17   |
|     | At least 40 years                                                                                                                              | White 91%                                                                                    | E60 78            | Nap1000 218 | N1000 35   | N1000 9 | N1000 19 |
|     | Radiographic diagnosis                                                                                                                         | Mean age 62 years                                                                            | Nap1000 77        | Pbo 56      | Pbo 18     | Pbo 11  | Pbo 3    |
|     | At least 6/12 symptoms                                                                                                                         | Age range 40 to 92 years                                                                     | Pbo 69            |             |            |         |          |
|     | Minimum 40/100 mm at inclusion on flare visit, plus $\geq$ 15 mm increase and worsening in investigator global assessment since baseline visit | Hip 19%<br>Knee 81%<br>Median duration 5 years<br>ARA Class II/III 76%                       |                   |             |            |         |          |
| 019 | OA knee or hip                                                                                                                                 | Female 78%                                                                                   | 12                | E60 224     | E60 20     | E60 7   | E60 5    |
|     | At least 40 years                                                                                                                              | White 72%                                                                                    | E60 81            | Nap1000 221 | N1000 37   | N1000 7 | N1000 24 |
|     | Radiographic diagnosis                                                                                                                         | Mean age 63 years                                                                            | Nap1000 77        | Pbo 56      | Pbo 12     | Pbo 6   | Pbo 6    |
|     | At least 6/12 symptoms                                                                                                                         | Age range 35 to 84 years                                                                     | Pbo 73            |             |            |         |          |
|     | Minimum 40/100 mm at inclusion on flare visit, plus $\geq$ 15 mm increase and worsening in investigator global assessment since baseline visit | Hip 25%<br>Knee 75%<br>Median duration 4 years<br>ARA Class II/III 81%                       |                   |             |            |         |          |
| 024 | At least 4 of 7 ARA criteria                                                                                                                   | Female 77%                                                                                   | 12                | E90 323     | E90 93     | E90 70  | E90 11   |
|     | At least 6/12 duration                                                                                                                         | White 87%                                                                                    | E90 70            | Nap1000 170 | Nap1000 71 | Nap1000 | Nap1000  |
|     | 18 years or older                                                                                                                              | Mean age 56 years                                                                            | Nap1000 62        | Pbo 323     | Pbo 201    | 62      | 13       |
|     | Patient global assessment $\geq$ 40 mm, $\geq$ 6 tender and $\geq$ 2 swollen joints                                                            | Age range 21 to 99 years                                                                     | Pbo 48            |             |            | Pbo 176 | Pbo 8    |
|     |                                                                                                                                                | Median duration 6.7 years<br>ARA Class II/III 79%<br>methotrexate 48%,<br>corticosteroid 32% |                   |             |            |         |          |

|     |                                                                                                                                                                    |                                                                                                                                                                          |                                        |                                     |                                  |                                |                                  |
|-----|--------------------------------------------------------------------------------------------------------------------------------------------------------------------|--------------------------------------------------------------------------------------------------------------------------------------------------------------------------|----------------------------------------|-------------------------------------|----------------------------------|--------------------------------|----------------------------------|
| 025 | At least 4 of 7 ARA criteria<br>At least 6/12 duration<br>18 years or older<br>Patient global assessment $\geq$ 40 mm, $\geq$ 6 tender and $\geq$ 2 swollen joints | Female 77%<br>White 87%<br>Mean age 56 years<br>Age range 21 to 99 years<br>Median duration 6.7 years<br>ARA Class II/III 79%<br>methotrexate 48%,<br>corticosteroid 32% | 12<br>E90 76<br>Nap1000 77<br>Pbo 66   | E90 353<br>Nap1000 181<br>Pbo 357   | E90 59<br>Nap1000 30<br>Pbo 115  | E90 44<br>Nap1000 19<br>Pbo 90 | E90 9<br>Nap1000 5<br>Pbo 6      |
| 026 | OA or RA needing NSAID for at least 3 months<br>RA 18 years or older<br>Diagnosis at least 6/12<br>OA 50 years or older                                            | Female 82%<br>White 57%, Hispanic 20%<br>Mean age 54 years<br>Age range 18 to 83 years<br>OA 25%, RA 75%                                                                 | 12<br>E120 74<br>Nap1000 69<br>Pbo 75  | E120 251<br>Nap1000 244<br>Pbo 247  | E120 51<br>Nap1000 94<br>Pbo 42  | E120 6<br>Nap1000 3<br>Pbo 14  | E120 16<br>Nap1000 25<br>Pbo 14  |
| 029 | Established OA needing NSAID for at least 3 months<br>At least 50 years                                                                                            | Female 74%<br>White 80%<br>Mean age 62 years<br>Age range 45 to 99 years                                                                                                 | 12<br>E120 76<br>Ibu 2400 73<br>Pbo 77 | E120 221<br>Ibu 2400 226<br>Pbo 233 | E120 40<br>Ibu 2400 66<br>Pbo 40 | E120 2<br>Ibu 2400 3<br>Pbo 6  | E120 17<br>Ibu 2400 15<br>Pbo 11 |
| 041 | Age 18 to 75 years<br>Mnimum 40 /100 mm at randomisation, $>$ 10 mm since screen, worsening since screen                                                           | Female 63%<br>White 92%<br>Mean age 53 years<br>Age range 19 to 78 years                                                                                                 | 12<br>E60 70<br>E90 70<br>Pbo 68       | E60 109<br>E90 106<br>Pbo 110       | E60 32<br>E90 29<br>Pbo 33       | E60 9<br>E90 7<br>Pbo 17       | E60 12<br>E90 11<br>Pbo 7        |

|     |                                                                                                                                                                                              |                                                                                            |                                                                                       |                                                   |                                               |                                            |                                           |
|-----|----------------------------------------------------------------------------------------------------------------------------------------------------------------------------------------------|--------------------------------------------------------------------------------------------|---------------------------------------------------------------------------------------|---------------------------------------------------|-----------------------------------------------|--------------------------------------------|-------------------------------------------|
| 042 | Age 18 to 75 years<br>Mnimum 40 /100 mm at<br>randomisation, >10 mm since<br>screen, worsening since screen                                                                                  | Female 61%<br>White 89%<br>Mean age 52 years<br>Age range 20 to 75 years                   | 12<br>E60 71<br>E90 67<br>Pbo 64                                                      | E60 103<br>E90 107<br>Pbo 109                     | E60 28<br>E90 35<br>Pbo 44                    | E60 6<br>E90 12<br>Pbo 27                  | E60 12<br>E90 12<br>Pbo 9                 |
| 065 | Age 40 years or more<br>Diagnosis of OA<br>treated with NSAID/coxib                                                                                                                          | Female 60%<br>White 80%<br>Age range 40 to over 80 years,<br>mean about 60 years           | 12<br>Drug exposure<br>close to 100%<br>E90 72<br>Cel 400 73<br>Ibu 2400 72<br>Pbo 68 | E90 108<br>Cel 400 107<br>Ibu 2400 107<br>Pbo 111 | E90 25<br>Cel 400 23<br>Ibu 2400 24<br>Pbo 32 | E90 5<br>Cel 400 3<br>Ibu 2400 4<br>Pbo 13 | E90 12<br>Cel 400 11<br>Ibu 2400<br>Pbo 9 |
| 071 | OA knee or hip<br>Clinical and radiographic<br>criteria<br>At least 6/12 symptoms<br>Minimum 40/100 mm pain,<br>increase of at least 15 mm from<br>baseline, and worsening since<br>baseline | Female 71%<br>White 89%<br>Mean age 62 years<br>Age range 40 to 89 years                   | 12<br>Compliance 94%<br>Mean days on<br>drug<br>E30 75<br>Ibu 2400 67<br>Pbo 56       | E30 214<br>Ibu 2400 210<br>Pbo 104                | E30 42<br>Ibu 2400 64<br>Pbo 49               | E30 25<br>Ibu 2400<br>30<br>Pbo 31         | E30 11<br>Ibu 2400<br>22<br>Pbo 6         |
| 073 | OA knee or hip<br>Clinical and radiographic<br>criteria<br>At least 6/12 symptoms<br>Minimum 40/100 mm pain,<br>increase of at least 15 mm from<br>baseline, and worsening since<br>baseline | Female 76%<br>White 48%<br>Mean age 63 years<br>Age range 41 to 86 years                   | 12<br>Compliance 93%<br>Mean days on<br>drug<br>E30 74<br>Ibu 2400 71<br>Pbo 66       | E30 224<br>Ibu 2400 213<br>Pbo 221                | E30 41<br>Ibu 2400 46<br>Pbo 32               | E30 16<br>Ibu 2400<br>15<br>Pbo 21         | E30 11<br>Ibu 2400<br>19<br>Pbo 5         |
| 076 | OA knee or hip<br>Clinical and radiographic<br>criteria<br>At least 6/12 symptoms<br>Minimum 40/100 mm pain,<br>increase of at least 15 mm from<br>baseline, and worsening since<br>baseline | Female 67%<br>White 88%<br>Mean age 62 years<br>Age range 40 to 91 years<br>ARA II/III 82% | 12<br>Compliance 99%<br>Mean days on<br>drug<br>E30 78<br>C200 73<br>Pbo 67           | E30 231<br>C200 241<br>Pbo 127                    | E30 40<br>C200 49<br>Pbo 42                   | E30 14<br>C200 22<br>Pbo 31                | E30 10<br>C200 12<br>Pbo 6                |

|     |                                                                                                                                                                                              |                                                                                            |                                                                             |                                |                             |                             |                           |
|-----|----------------------------------------------------------------------------------------------------------------------------------------------------------------------------------------------|--------------------------------------------------------------------------------------------|-----------------------------------------------------------------------------|--------------------------------|-----------------------------|-----------------------------|---------------------------|
| 077 | OA knee or hip<br>Clinical and radiographic<br>criteria<br>At least 6/12 symptoms<br>Minimum 40/100 mm pain,<br>increase of at least 15 mm from<br>baseline, and worsening since<br>baseline | Female 66%<br>White 88%<br>Mean age 62 years<br>Age range 41 to 88 years<br>ARA II/III 79% | 12<br>Compliance 99%<br>Mean days on<br>drug<br>E30 79<br>C200 76<br>Pbo 56 | E30 244<br>C200 247<br>Pbo 117 | E30 32<br>C200 45<br>Pbo 57 | E30 15<br>C200 24<br>Pbo 39 | E30 7<br>C200 8<br>Pbo 12 |
|-----|----------------------------------------------------------------------------------------------------------------------------------------------------------------------------------------------|--------------------------------------------------------------------------------------------|-----------------------------------------------------------------------------|--------------------------------|-----------------------------|-----------------------------|---------------------------|

**Studies of >24 weeks**

|     |                                                                                     |                                                                          |                                                                                                                                                                                       |                                                                                                                |                                                                                                                |                                                                                                          |                                                                                                            |
|-----|-------------------------------------------------------------------------------------|--------------------------------------------------------------------------|---------------------------------------------------------------------------------------------------------------------------------------------------------------------------------------|----------------------------------------------------------------------------------------------------------------|----------------------------------------------------------------------------------------------------------------|----------------------------------------------------------------------------------------------------------|------------------------------------------------------------------------------------------------------------|
| 061 | OA knee, hip, hand, spine<br>Age at least 5 years<br>NSAID needed for 12 months     | Female 72%<br>White 85%<br>Mean age 64 years<br>Age range 44 to 92       | 52<br>E90 9.3<br>Dic 150 8.9<br>E90 2789 py<br>Dic 150 2604 py                                                                                                                        | E90 3593<br>Dic 150 3518                                                                                       | E90 1455<br>Dic 150 1612                                                                                       | E90 350<br>Dic 150<br>374                                                                                | E90 632<br>Dic 150<br>610                                                                                  |
| 066 | At least 50 years<br>OA of knee, hip, hand, or spine<br>or RA (4 of 7 ARA criteria) | Female 74%<br>White 79%<br>Mean age 63 years<br>Age range 45 to 94 years | 52+<br>OA<br>E60 20.8<br>m/11746 py<br>D150 20.2<br>mo/11288 py<br>OA<br>E90 20.4<br>mo/3686 py<br>D150 19.4<br>mo/3491 py<br>RA<br>E90 20.8<br>mo/4917 py<br>D150 20.1<br>mo/4786 py | <b>OA</b><br>E60 6769<br>D150 6700<br><b>OA</b><br>E90 2171<br>D150 2162<br><b>RA</b><br>E90 2841<br>D150 2855 | <b>OA</b><br>E60 3524<br>D150 3590<br><b>OA</b><br>E90 1584<br>D150 1582<br><b>RA</b><br>E90 1490<br>D150 1573 | <b>OA</b><br>E60 596<br>D150 594<br><b>OA</b><br>E90 281<br>D150 302<br><b>RA</b><br>E90 217<br>D150 255 | <b>OA</b><br>E60 1133<br>D150 1208<br><b>OA</b><br>E90 565<br>D150 532<br><b>RA</b><br>E90 573<br>D150 567 |
| 072 | At least 50 years<br>RA with at least 4 of 7 ARA<br>criteria                        | Female 80%<br>White 64%<br>Mean age 61 years<br>Age range 40 to 92 years | 52+<br>Compliance 97%<br>E30 19.3 m/3275<br>py<br>Dic 150 19.1<br>m/3262 py                                                                                                           | E90 2032<br>Dic 150 2054                                                                                       | E90 1028<br>Dic 150 1045                                                                                       | E90 122<br>Dic 150<br>162                                                                                | E90 419<br>Dic 150<br>397                                                                                  |

## Cause of discontinuations

## Time to discontinuation

| Laboratory AE                                      | GI AE                                              | Oedema AE                                          | Hypertension AE                                    | Serious AE                                         | All cause                                                                            | Lack of efficacy                                                                                                            | Adverse event                                                                                                                   |
|----------------------------------------------------|----------------------------------------------------|----------------------------------------------------|----------------------------------------------------|----------------------------------------------------|--------------------------------------------------------------------------------------|-----------------------------------------------------------------------------------------------------------------------------|---------------------------------------------------------------------------------------------------------------------------------|
| E 0<br>Diclo 1                                     | E 5<br>Diclo 3                                     | E 2<br>Diclo 0                                     | E2<br>Diclo 2                                      | E 3<br>Diclo 0                                     | wk E D<br>1 253 252<br>2 251 251<br>3 247 249<br>4 245 241<br>5 243 235<br>6 241 232 | wk E D<br>1 256 259<br>2 256 259<br>3 256 255<br>4 255 253<br>5 255 253<br>6 255 253                                        |                                                                                                                                 |
| E 60 0<br>Diclo 150 0                              | E 60 6<br>Diclo 150 6                              | E 60 4<br>Diclo 150 1                              | E 60 0<br>Diclo 150 0                              | E 60 1<br>Diclo 150 0                              | wk E D<br>1 222 218<br>2 213 206<br>3 208 202<br>4 206 198                           | wk E D<br>1 222 222<br>2 222 215<br>3 222 215<br>4 222 215                                                                  | wk E D<br>1 222 222<br>2 215 215<br>3 211 213<br>4 208 206                                                                      |
| E 5 0<br>E10 1<br>E30 0<br>E60 0<br>E90 0<br>Pbo 0 | E 5 0<br>E10 1<br>E30 1<br>E60 1<br>E90 3<br>Pbo 0 | E 5 0<br>E10 0<br>E30 0<br>E60 0<br>E90 1<br>Pbo 0 | E 5 0<br>E10 0<br>E30 0<br>E60 0<br>E90 0<br>Pbo 0 | E 5 2<br>E10 3<br>E30 3<br>E60 4<br>E90 7<br>Pbo 2 |                                                                                      | wk E30 E60 P<br>1 102 111 59<br>2 101 111 57<br>3 99 111 54<br>4 98 110 53<br>5 98 110 53<br>6 98 110 53                    | wk E30 E60 P<br>1 102 112 60<br>2 102 110 59<br>3 102 110 59<br>4 101 110 59<br>5 101 109 58<br>6 99 110 58                     |
| E90 0<br>E120 0<br>Nap 1000 0<br>Pbo 0             | E90 1<br>E120 0<br>Nap 1000<br>Pbo 0               | E90 0<br>E120 0<br>Nap 1000<br>Pbo 0               | E90 0<br>E120 0<br>Nap 1000 0<br>Pbo 0             | E90 2<br>E120 0<br>Nap 1000 2<br>Pbo 0             |                                                                                      | wk E90 E120 N1000 P<br>1 103 91 99 88<br>2 103 91 96 84<br>3 98 86 88 63<br>4 97 85 86 57<br>5 96 84 80 50<br>6 96 83 79 49 | wk E90 E120 N1000 P<br>1 103 92 99 93<br>2 102 92 99 93<br>3 102 92 99 93<br>4 102 92 99 93<br>5 101 92 98 93<br>6 101 92 98 93 |

|           |           |           |           |           |                |                |
|-----------|-----------|-----------|-----------|-----------|----------------|----------------|
| E10 1     | E10 0     | E10 0     | E10 0     | E10 0     | wk E60 E90 P   | wk E60 E90 P   |
| E60 0     | E60 4     | E60 1     | E60 0     | E60 1     | 1 126 134 122  | 1 125 133 123  |
| E90 0     | E90 0     | E90 0     | E90 0     | E90 3     | 2 126 134 117  | 2 123 131 122  |
| E120 0    | E120 3    | E120 0    | E120 0    | E120 2    | 3 126 134 117  | 3 122 131 122  |
| Pbo 0     | Pbo 0     | Pbo 0     | Pbo 0     | Pbo 3     | 4 126 134 116  | 4 122 131 122  |
|           |           |           |           |           | 5 126 131 113  | 5 121 131 121  |
|           |           |           |           |           | 6 126 131 113  | 6 121 131 121  |
|           |           |           |           |           | 8 123 131 112  | 8 120 131 119  |
| E60 0     | E60 1     | E60 0     | E60 1     | E60 3     | wk E60 N1000 P | wk E60 N1000 P |
| N1000 1   | N1000 2   | N1000 1   | N1000 0   | N1000 1   | 1 222 218 54   | 1 222 216 56   |
| Pbo 0     | Pbo 0     | Pbo 1     | Pbo 0     | Pbo 1     | 2 222 216 53   | 2 220 216 56   |
|           |           |           |           |           | 3 220 214 49   | 3 218 214 56   |
|           |           |           |           |           | 4 218 214 45   | 4 218 211 56   |
|           |           |           |           |           | 5 213 209 45   | 5 218 209 55   |
|           |           |           |           |           | 6 213 209 45   | 6 215 207 55   |
|           |           |           |           |           | 8 213 209 45   | 8 211 207 55   |
|           |           |           |           |           | 12 209 209 45  | 12 206 201 53  |
| E60 0     | E60 2     | E60 0     | E60 0     | E60 0     | wk E60 N1000 P | wk E60 N1000 P |
| N1000 0   | N1000 18  | N1000 0   | N1000 0   | N1000 7   | 1 224 221 55   | 1 224 217 54   |
| Pbo 0     | Pbo 2     | Pbo 0     | Pbo 0     | Pbo 0     | 2 224 219 54   | 2 222 214 54   |
|           |           |           |           |           | 3 222 219 53   | 3 220 212 52   |
|           |           |           |           |           | 4 222 219 53   | 4 220 210 52   |
|           |           |           |           |           | 5 222 217 52   | 5 220 206 52   |
|           |           |           |           |           | 6 222 217 51   | 6 220 203 51   |
|           |           |           |           |           | 8 222 214 51   | 8 220 201 51   |
|           |           |           |           |           | 12 220 212 50  | 12 219 194 49  |
| E90 1     | E90 3     | E90 1     | E90 1     | E90 4     | wk E90 N1000 P | wk E90 N1000 P |
| Nap1000 1 | Nap1000 4 | Nap1000 0 | Nap1000 1 | Nap1000 1 | 1 323 170 317  | 1 320 168 320  |
| Pbo 1     | Pbo 4     | Pbo 0     | Pbo 0     | Pbo 2     | 2 320 165 304  | 2 317 168 317  |
|           |           |           |           |           | 3 297 148 229  | 3 317 167 313  |
|           |           |           |           |           | 4 291 145 213  | 4 317 165 313  |
|           |           |           |           |           | 5 275 128 178  | 5 313 163 310  |
|           |           |           |           |           | 6 271 122 168  | 6 313 163 307  |
|           |           |           |           |           | 8 268 121 162  | 8 313 163 307  |
|           |           |           |           |           | 12 252 107 142 | 12 310 160 307 |

|           |           |           |           |           |
|-----------|-----------|-----------|-----------|-----------|
| E90 0     | E90 2     | E90 0     | E90 0     | E90 0     |
| Nap1000 0 | Nap1000 2 | Nap1000 0 | Nap1000 1 | Nap1000 1 |
| Pbo 4     | Pbo 2     | Pbo 0     | Pbo 0     | Pbo 0     |

wk E90 N1000 P  
 1 349 181 353  
 2 349 179 343  
 3 339 176 318  
 4 335 176 311  
 5 321 172 289  
 6 318 170 286  
 8 314 167 282  
 12 311 161 261

wk E90 N1000 P  
 1 353 179 357  
 2 349 177 353  
 3 349 177 350  
 4 349 177 350  
 5 346 177 346  
 6 346 177 346  
 8 346 176 343  
 12 342 176 343

|           |            |           |           |           |
|-----------|------------|-----------|-----------|-----------|
| E120 0    | E120 10    | E120 0    | E120 0    | E120 2    |
| Nap1000 0 | Nap1000 22 | Nap1000 0 | Nap1000 1 | Nap1000 1 |
| Pbo 1     | Pbo 1      | Pbo 0     | Pbo 0     | Pbo 6     |

wk E120 N1000 P  
 1 251 242 247  
 2 248 242 247  
 3 246 242 245  
 4 243 242 245  
 5 243 242 245  
 6 243 242 245  
 8 238 239 245  
 12 236 239 242

wk E120 N1000 P  
 1 248 242 245  
 2 243 239 245  
 3 243 237 240  
 4 243 237 240  
 5 241 234 240  
 6 238 232 232  
 8 238 232 220  
 12 236 229 220

|            |             |            |            |            |
|------------|-------------|------------|------------|------------|
| E120 2     | E120 10     | E120 1     | E120 2     | E120 2     |
| Ibu 2400 0 | Ibu 2400 11 | Ibu 2400 1 | Ibu 2400 0 | Ibu 2400 3 |
| Pbo 0      | Pbo 9       | Pbo 0      | Pbo 0      | Pbo 2      |

wk E120 Ibu2400 P  
 1 221 226 233  
 2 221 226 231  
 3 221 226 231  
 4 221 226 231  
 5 221 226 231  
 6 221 224 228  
 8 219 224 228  
 12 219 221 226

wk E120 Ibu2400 P  
 1 219 226 233  
 2 219 224 231  
 3 217 221 228  
 4 212 221 228  
 5 212 221 226  
 6 208 219 226  
 8 203 215 224  
 12 201 210 221

|       |       |       |       |       |
|-------|-------|-------|-------|-------|
| E60 2 | E60 4 | E60 0 | E60 0 | E60 0 |
| E90 3 | E90 3 | E90 1 | E90 0 | E90 1 |
| Pbo 2 | Pbo 1 | Pbo 0 | Pbo 0 | Pbo 0 |

wk E60 E90 P  
 1 105 104 107  
 2 103 104 104  
 3 102 104 101  
 4 102 104 97  
 5 99 102 97  
 6 99 102 97  
 8 98 101 93  
 12 96 99 92

wk E60 E90 P  
 1 105 104 108  
 2 104 98 106  
 3 102 96 105  
 4 101 94 102  
 5 98 93 102  
 6 96 93 102  
 8 96 92 101  
 12 91 91 99

E60 2 E60 1 E60 2 E60 1 E60 1  
E90 5 E90 4 E90 1 E90 2 E90 1  
Pbo 1 Pbo 4 Pbo 1 Pbo 0 Pbo 1

wk E60 E90 P  
1 103 106 107  
2 100 105 99  
3 100 100 97  
4 100 99 96  
5 99 99 92  
6 99 98 91  
8 98 96 86  
12 97 95 81

wk E60 E90 P  
1 101 107 107  
2 97 104 107  
3 94 101 107  
4 93 100 107  
5 93 96 106  
6 92 95 106  
8 92 93 105  
12 89 89 96

E90 0 E90 7 E90 1 E90 2 E90 1  
Cel 400 0 Cel 400 2 Cel 400 0 Cel 400 0 Cel 400 3  
Ibu 2400 0 Ibu 2400 6 Ibu 2400 1 Ibu 2400 0 Ibu 2400 0  
Pbo 0 Pbo 0 Pbo 0 Pbo 0 Pbo 0

wk E90 C400 I2400 P  
6 105 105 103 101  
12 103 104 103 98

wk E90 C400 I2400 P  
6 102 98 98 103  
12 96 96 96 102

E30 0 E30 3 E30 0 E30 2 E30 2  
Ibu 2400 2 Ibu 2400 Ibu 2400 3 Ibu 2400 3 Ibu 2400 2  
Pbo 0 11 Pbo 0 Pbo 1 Pbo 0  
Pbo 2

wk E30 Ibu2400 P  
1 212 208 102  
2 210 206 95  
3 208 197 86  
4 203 191 81  
5 199 187 75  
6 197 187 74  
8 195 185 73  
12 188 176 71

wk E30 Ibu2400 P  
1 214 206 103  
2 212 204 102  
3 210 200 102  
4 210 197 102  
5 208 195 101  
6 208 195 99  
8 208 189 97  
12 201 183 96

E30 0 E30 4 E30 1 E30 2 E30 0  
Ibu 2400 2 Ibu 2400 Ibu 2400 1 Ibu 2400 2 Ibu 2400 0  
Pbo 2 10 Pbo 0 Pbo 0 Pbo 0  
Pbo 8

wk E30 Ibu2400 P  
1 222 213 219  
2 222 211 206  
3 220 207 197  
4 215 204 192  
5 211 200 181  
6 211 200 179  
8 208 198 177  
12 204 194 177

wk E30 Ibu2400 P  
1 220 211 221  
2 217 207 217  
3 217 198 208  
4 217 196 208  
5 217 194 206  
6 217 194 206  
8 215 194 206  
12 213 192 206

E30 1 E30 3 E30 1 E30 2 E30 1  
C200 2 C200 2 C200 1 C200 0 C200 2  
Pbo 0 Pbo 0 Pbo 0 Pbo 0 Pbo 1

wk E30 C200 P  
1 231 236 124  
2 229 234 118  
3 226 231 110  
4 226 229 104  
5 224 224 98  
6 224 224 97  
8 224 222 95  
12 217 222 95

wk E30 C200 P  
1 226 239 127  
2 226 236 126  
3 226 234 124  
4 226 231 122  
5 224 231 122  
6 224 231 122  
8 224 229 122  
12 219 227 121

|        |        |        |        |        |  |               |                |
|--------|--------|--------|--------|--------|--|---------------|----------------|
| E30 0  | E30 3  | E30 1  | E30 0  | E30 0  |  | wk E30 C200 P | wk E30 C200 P  |
| C200 1 | C200 2 | C200 0 | C200 0 | C200 2 |  | 1 244 247 109 | 1 244 247 110  |
| Pbo 0  | Pbo 5  | Pbo 0  | Pbo 0  | Pbo 3  |  | 2 242 245 101 | 2 244 247 109  |
|        |        |        |        |        |  | 3 239 235 92  | 3 242 245 106  |
|        |        |        |        |        |  | 4 237 232 83  | 4 242 245 106  |
|        |        |        |        |        |  | 5 232 230 82  | 5 242 240 106  |
|        |        |        |        |        |  | 6 229 230 80  | 6 242 240 106  |
|        |        |        |        |        |  | 8 229 227 78  | 8 239 240 105  |
|        |        |        |        |        |  | 12 229 225 76 | 12 239 240 103 |

|             |             |            |            |             |         |                    |         |
|-------------|-------------|------------|------------|-------------|---------|--------------------|---------|
| E90 23      | E90 262     | E90 33     | E90 81     | E90 109     | No data | data unextractable | no data |
| Dic 150 194 | Dic 150 498 | Dic 150 26 | Dic 150 23 | Dic 150 104 |         |                    |         |

|           |           |           |           |           |                   |         |                                       |
|-----------|-----------|-----------|-----------|-----------|-------------------|---------|---------------------------------------|
| <b>OA</b> | <b>OA</b> | <b>OA</b> | <b>OA</b> | <b>OA</b> | Overall           | No data | Data on clinical plus laboratory only |
| E60 86    | E60 213   | E60 56    | E60 146   | E60 404   | treatment group   |         |                                       |
| D150 175  | D150 369  | D150 49   | D150 109  | D150 400  | all cause         |         |                                       |
| <b>OA</b> | <b>OA</b> | <b>OA</b> | <b>OA</b> | <b>OA</b> | discontinuation - |         |                                       |
| E90 61    | E90 134   | E90 41    | E90 55    | E90 201   | plus dease and    |         |                                       |
| D150 135  | D150 195  | D150 17   | D150 24   | D150 166  | dose              |         |                                       |
| <b>RA</b> | <b>RA</b> | <b>RA</b> | <b>RA</b> | <b>RA</b> |                   |         |                                       |
| E90 48    | E90 96    | E90 28    | E90 69    | E90 243   |                   |         |                                       |
| D150 81   | D150 169  | D150 16   | D150 46   | D150 196  |                   |         |                                       |

|            |             |           |            |             |         |                    |                    |
|------------|-------------|-----------|------------|-------------|---------|--------------------|--------------------|
| E90 23     | E90 125     | E90 23    | E90 51     | E90 129     | No data | data unextractable | data unextractable |
| Dic 150 44 | Dic 150 179 | Dic 150 8 | Dic 150 31 | Dic 150 127 |         |                    |                    |
