# Supplementary material for: Discontinuation rates in clinical trials in musculoskeletal pain: meta-analysis from etoricoxib clinical trial reports
Source: Springer Nature journal article supplement (doi:10.1186/ar2422), 2008-05-08
Supplement: Additional file 3 [file ar2422-s3.pdf]

**Additional file 3: Continuation rates (percent remaining in the study) over 12 weeks because of adverse event in trials lasting 4-12 weeks**

**All trials (osteoarthritis, rheumatoid arthritis, chronic low back pain, ankylosing spondylitis)**

| Week          | Placebo     | Etoricoxib  |             |             |            | Diclofenac<br>150 mg | Naproxen<br>1000 mg | Ibuprofen<br>2400 mg | Celecoxib<br>200/400 mg |
|---------------|-------------|-------------|-------------|-------------|------------|----------------------|---------------------|----------------------|-------------------------|
|               |             | 30 mg       | 60 mg       | 90 mg       | 120 mg     |                      |                     |                      |                         |
| <b>Number</b> | <b>2336</b> | <b>1015</b> | <b>1120</b> | <b>1238</b> | <b>664</b> |                      | <b>1113</b>         | <b>649</b>           | <b>488</b>              |
| 0             | 100         | 100         | 100         | 100         | 100        |                      | 100                 | 100                  | 100                     |
| 1             | 99          | 99          | 99          | 100         | 99         |                      | 99                  | 99                   | 100                     |
| 2             | 98          | 99          | 98          | 98          | 98         |                      | 98                  | 98                   | 99                      |
| 3             | 97          | 98          | 96          | 98          | 98         |                      | 98                  | 95                   | 98                      |
| 4             | 97          | 98          | 96          | 97          | 97         |                      | 97                  | 95                   | 98                      |
| 5             | 96          | 98          | 96          | 96          | 96         |                      | 96                  | 94                   | 97                      |
| 6             | 95          | 98          | 95          | 96          | 95         |                      | 95                  | 94                   | 97                      |
| 8             | 94          | 97          | 94          | 95          | 94         |                      | 95                  | 92                   | 96                      |
| 12            | 93          | 96          | 92          | 94          | 93         |                      | 93                  | 90                   | 96                      |

**OA trials only**

| Week          | Placebo    | Etoricoxib  |            |       |        | Diclofenac<br>150 mg | Naproxen<br>1000 mg | Ibuprofen<br>2400 mg | Celecoxib<br>200/400 mg |
|---------------|------------|-------------|------------|-------|--------|----------------------|---------------------|----------------------|-------------------------|
|               |            | 30 mg       | 60 mg      | 90 mg | 120 mg |                      |                     |                      |                         |
| <b>Number</b> | <b>974</b> | <b>1015</b> | <b>590</b> |       |        |                      | <b>439</b>          | <b>423</b>           | <b>488</b>              |
| 0             | 100        | 100         | 100        | 100   | 100    |                      | 100                 | 100                  | 100                     |
| 1             | 99         | 99          | 100        |       |        |                      | 99                  | 99                   | 100                     |
| 2             | 98         | 99          | 99         |       |        |                      | 98                  | 97                   | 99                      |
| 3             | 96         | 98          | 98         |       |        |                      | 97                  | 94                   | 98                      |
| 4             | 96         | 98          | 98         |       |        |                      | 96                  | 93                   | 98                      |
| 5             | 95         | 98          | 98         |       |        |                      | 95                  | 92                   | 97                      |
| 6             | 95         | 98          | 97         |       |        |                      | 93                  | 92                   | 97                      |
| 8             | 94         | 97          | 95         |       |        |                      | 93                  | 91                   | 96                      |
| 12            | 93         | 96          | 93         |       |        |                      | 90                  | 89                   | 96                      |

**RA trials only**

| Week          | Placebo     | Etoricoxib |       |            |            | Diclofenac<br>150 mg | Naproxen<br>1000 mg | Ibuprofen<br>2400 mg | Celecoxib<br>200/400 mg |
|---------------|-------------|------------|-------|------------|------------|----------------------|---------------------|----------------------|-------------------------|
|               |             | 30 mg      | 60 mg | 90 mg      | 120 mg     |                      |                     |                      |                         |
| <b>Number</b> | <b>1050</b> |            |       | <b>810</b> | <b>371</b> |                      | <b>595</b>          |                      |                         |
| 0             | 100         | 100        | 100   | 100        | 100        | 100                  | 100                 | 100                  | 100                     |
| 1             | 100         |            |       | 100        | 99         |                      | 99                  |                      |                         |
| 2             | 99          |            |       | 98         | 98         |                      | 98                  |                      |                         |
| 3             | 98          |            |       | 98         | 97         |                      | 98                  |                      |                         |
| 4             | 98          |            |       | 98         | 97         |                      | 97                  |                      |                         |
| 5             | 97          |            |       | 98         | 96         |                      | 96                  |                      |                         |
| 6             | 96          |            |       | 98         | 95         |                      | 96                  |                      |                         |
| 8             | 94          |            |       | 98         | 95         |                      | 96                  |                      |                         |
| 12            | 94          |            |       | 96         | 94         |                      | 95                  |                      |                         |
